# Supplementary material for: 2022 American College of Rheumatology/European Alliance of Associations for Rheumatology classification criteria for granulomatosis with polyangiitis
Source: HighWire-hosted journal article supplement (doi:10.1136/annrheumdis-2021-221795), 2022-02-02
Supplement: annrheumdis-2021-221795supp002_data_supplement.pdf [file annrheumdis-2021-221795supp002_data_supplement.pdf]

**2022 AMERICAN COLLEGE OF RHEUMATOLOGY / EUROPEAN ALLIANCE OF ASSOCIATIONS FOR RHEUMATOLOGY**  
**CLASSIFICATION CRITERIA FOR GRANULOMATOSIS WITH POLYANGIITIS**

**CONSIDERATIONS WHEN APPLYING THESE CRITERIA**

- These classification criteria should be applied to classify a patient as having granulomatosis with polyangiitis when a diagnosis of small- or medium-vessel vasculitis has been made
- Alternate diagnoses mimicking vasculitis should be excluded prior to applying the criteria

**CLINICAL CRITERIA**

|                                                                                                                                                 |           |
|-------------------------------------------------------------------------------------------------------------------------------------------------|-----------|
| Nasal involvement: bloody discharge, ulcers, crusting, congestion, blockage, or septal defect / perforation                                     | <b>+3</b> |
| Cartilaginous involvement (inflammation of ear or nose cartilage, hoarse voice or stridor, endobronchial involvement, or saddle nose deformity) | <b>+2</b> |
| Conductive or sensorineural hearing loss                                                                                                        | <b>+1</b> |

**LABORATORY, IMAGING, AND BIOPSY CRITERIA**

|                                                                                                                          |           |
|--------------------------------------------------------------------------------------------------------------------------|-----------|
| Positive test for cytoplasmic antineutrophil cytoplasmic antibodies (cANCA) or antiproteinase 3 antibodies (anti-PR3)    | <b>+5</b> |
| Pulmonary nodules, mass, or cavitation on chest imaging                                                                  | <b>+2</b> |
| Granuloma, extravascular granulomatous inflammation, or giant cells on biopsy                                            | <b>+2</b> |
| Inflammation, consolidation, or effusion of the nasal/paranasal sinuses, or mastoiditis on imaging                       | <b>+1</b> |
| Pauci-immune glomerulonephritis on biopsy                                                                                | <b>+1</b> |
| Positive test for perinuclear antineutrophil cytoplasmic antibodies (pANCA) or antimyeloperoxidase (anti-MPO) antibodies | <b>-1</b> |
| Blood eosinophil count $\geq 1 \times 10^9/\text{liter}$                                                                 | <b>-4</b> |

**Sum the scores for 10 items, if present. A score of  $\geq 5$  is needed for classification of GRANULOMATOSIS WITH POLYANGIITIS.**

**ACR**  
 AMERICAN COLLEGE  
 of RHEUMATOLOGY

**eular** | EUROPEAN ALLIANCE  
 OF ASSOCIATIONS  
 FOR RHEUMATOLOGY

Arthritis Rheumatol. 2022  
 Ann Rheum Dis. 2022
